# Supplementary material for: Genome-wide association study identifies 16 genomic regions associated with circulating cytokines at birth
Source: PLoS Genet. 2020 Nov 23;16(11):e1009163. doi: 10.1371/journal.pgen.1009163 (PMC7721185; doi:10.1371/journal.pgen.1009163)
Supplement: S6 Table — (XLSX) [file pgen.1009163.s007.xlsx]

## Sheet: Sheet1
FineMapping									Ensemble VEP						HaploReg v4.1
SNP	CHR	POS	A1	A2	P	Zscore	PIP	LBF	Gene	postion	Distance	Impact	LoFtool	CADD_PHRED	Epigenome IDs	Epigenome groups	Description	Chromatin stats (Core 15-state model)	Chromatin states (25-model using 12 imputed marks)	H3K27ac	H3K4me1	H3K4me3	DNase
rs11910707	21	48042513	T	G	1.261e-205	30.5990265943	1.0	13.2524	PRMT2	upstream	12566	modifier	0.757	1.426	E017	IMR90	IMR90 fetal lung fibroblasts Cell Line		18_EnhAc		H3K4me1_Enh
															E002	ESC	ES-WA7 Cells	7_Enh	15_EnhAF
															E008	ESC	H9 Cells		18_EnhAc		H3K4me1_Enh
															E001	ESC	ES-I3 Cells		15_EnhAF
															E015	ESC	HUES6 Cells		15_EnhAF
															E014	ESC	HUES48 Cells		15_EnhAF	H3K27ac_Enh	H3K4me1_Enh
															E016	ESC	HUES64 Cells		15_EnhAF	H3K27ac_Enh
															E003	ESC	H1 Cells		18_EnhAc		H3K4me1_Enh
															E024	ESC	ES-UCSF4 Cells		18_EnhAc		H3K4me1_Enh
															E020	iPSC	iPS-20b Cells	7_Enh	14_EnhA2	H3K27ac_Enh	H3K4me1_Enh
															E019	iPSC	iPS-18 Cells	7_Enh	14_EnhA2	H3K27ac_Enh	H3K4me1_Enh
															E018	iPSC	iPS-15b Cells	7_Enh	18_EnhAc		H3K4me1_Enh
															E022	iPSC	iPS DF 19.11 Cells		18_EnhAc		H3K4me1_Enh		DNase
															E007	ES-deriv	H1 Derived Neuronal Progenitor Cultured Cells		15_EnhAF	H3K27ac_Enh	H3K4me1_Enh		DNase
															E009	ES-deriv	H9 Derived Neuronal Progenitor Cultured Cells	7_Enh	14_EnhA2		H3K4me1_Enh	H3K4me3_Pro
															E010	ES-deriv	H9 Derived Neuron Cultured Cells	2_TssAFlnk	13_EnhA1		H3K4me1_Enh	H3K4me3_Pro
															E013	ES-deriv	hESC Derived CD56+ Mesoderm Cultured Cells	7_Enh	13_EnhA1	H3K27ac_Enh	H3K4me1_Enh
															E012	ES-deriv	hESC Derived CD56+ Ectoderm Cultured Cells	7_Enh	13_EnhA1	H3K27ac_Enh	H3K4me1_Enh	H3K4me3_Pro
															E011	ES-deriv	hESC Derived CD184+ Endoderm Cultured Cells	7_Enh	14_EnhA2	H3K27ac_Enh
															E004	ES-deriv	H1 BMP4 Derived Mesendoderm Cultured Cells		18_EnhAc		H3K4me1_Enh
															E005	ES-deriv	H1 BMP4 Derived Trophoblast Cultured Cells		18_EnhAc		H3K4me1_Enh
															E006	ES-deriv	H1 Derived Mesenchymal Stem Cells	7_Enh	17_EnhW2	H3K27ac_Enh	H3K4me1_Enh
															E062	Blood & T-cell	Primary mononuclear cells from peripheral blood		14_EnhA2	H3K27ac_Enh	H3K4me1_Enh
															E034	Blood & T-cell	Primary T cells from peripheral blood	7_Enh	13_EnhA1	H3K27ac_Enh	H3K4me1_Enh	H3K4me3_Pro	DNase
															E045	Blood & T-cell	Primary T cells effector/memory enriched from peripheral blood	7_Enh	13_EnhA1	H3K27ac_Enh	H3K4me1_Enh	H3K4me3_Pro
															E033	Blood & T-cell	Primary T cells from cord blood	2_TssAFlnk	13_EnhA1		H3K4me1_Enh	H3K4me3_Pro	DNase
															E044	Blood & T-cell	Primary T regulatory cells from peripheral blood		14_EnhA2		H3K4me1_Enh
															E043	Blood & T-cell	Primary T helper cells from peripheral blood	7_Enh	2_PromU	H3K27ac_Enh	H3K4me1_Enh	H3K4me3_Pro
															E039	Blood & T-cell	Primary T helper naive cells from peripheral blood	2_TssAFlnk	2_PromU	H3K27ac_Enh	H3K4me1_Enh	H3K4me3_Pro
															E041	Blood & T-cell	Primary T helper cells PMA-I stimulated	2_TssAFlnk	2_PromU	H3K27ac_Enh	H3K4me1_Enh	H3K4me3_Pro
															E042	Blood & T-cell	Primary T helper 17 cells PMA-I stimulated	7_Enh	14_EnhA2	H3K27ac_Enh	H3K4me1_Enh
															E040	Blood & T-cell	Primary T helper memory cells from peripheral blood 1	7_Enh	2_PromU	H3K27ac_Enh	H3K4me1_Enh
															E037	Blood & T-cell	Primary T helper memory cells from peripheral blood 2	7_Enh	2_PromU	H3K27ac_Enh	H3K4me1_Enh
															E048	Blood & T-cell	Primary T CD8+ memory cells from peripheral blood	7_Enh	14_EnhA2	H3K27ac_Enh	H3K4me1_Enh	H3K4me3_Pro
															E038	Blood & T-cell	Primary T helper naive cells from peripheral blood	2_TssAFlnk	2_PromU	H3K27ac_Enh	H3K4me1_Enh	H3K4me3_Pro
															E047	Blood & T-cell	Primary T CD8+ naive cells from peripheral blood	7_Enh	2_PromU	H3K27ac_Enh	H3K4me1_Enh	H3K4me3_Pro
															E029	HSC & B-cell	Primary monocytes from peripheral blood	7_Enh	2_PromU	H3K27ac_Enh	H3K4me1_Enh		DNase
															E031	HSC & B-cell	Primary B cells from cord blood	7_Enh	14_EnhA2		H3K4me1_Enh
															E035	HSC & B-cell	Primary hematopoietic stem cells	7_Enh	14_EnhA2		H3K4me1_Enh
															E051	HSC & B-cell	Primary hematopoietic stem cells G-CSF-mobilized Male	2_TssAFlnk	13_EnhA1		H3K4me1_Enh	H3K4me3_Pro	DNase
															E050	HSC & B-cell	Primary hematopoietic stem cells G-CSF-mobilized Female	7_Enh	2_PromU	H3K27ac_Enh	H3K4me1_Enh	H3K4me3_Pro	DNase
															E036	HSC & B-cell	Primary hematopoietic stem cells short term culture	7_Enh	13_EnhA1		H3K4me1_Enh	H3K4me3_Pro
															E032	HSC & B-cell	Primary B cells from peripheral blood	7_Enh	14_EnhA2	H3K27ac_Enh	H3K4me1_Enh		DNase
															E046	HSC & B-cell	Primary Natural Killer cells from peripheral blood	7_Enh	2_PromU	H3K27ac_Enh	H3K4me1_Enh	H3K4me3_Pro	DNase
															E030	HSC & B-cell	Primary neutrophils from peripheral blood	7_Enh	2_PromU			H3K4me3_Pro
															E026	Mesench	Bone Marrow Derived Cultured Mesenchymal Stem Cells		18_EnhAc	H3K27ac_Enh	H3K4me1_Enh
															E049	Mesench	Mesenchymal Stem Cell Derived Chondrocyte Cultured Cells	7_Enh	13_EnhA1	H3K27ac_Enh
															E025	Mesench	Adipose Derived Mesenchymal Stem Cell Cultured Cells		18_EnhAc
															E023	Mesench	Mesenchymal Stem Cell Derived Adipocyte Cultured Cells		18_EnhAc
															E052	Myosat	Muscle Satellite Cultured Cells		18_EnhAc
															E055	Epithelial	Foreskin Fibroblast Primary Cells skin01				H3K4me1_Enh
															E056	Epithelial	Foreskin Fibroblast Primary Cells skin02			H3K27ac_Enh	H3K4me1_Enh
															E059	Epithelial	Foreskin Melanocyte Primary Cells skin01		15_EnhAF	H3K27ac_Enh	H3K4me1_Enh	H3K4me3_Pro	DNase
															E061	Epithelial	Foreskin Melanocyte Primary Cells skin03	7_Enh	14_EnhA2	H3K27ac_Enh
															E057	Epithelial	Foreskin Keratinocyte Primary Cells skin02		19_DNase
															E058	Epithelial	Foreskin Keratinocyte Primary Cells skin03		18_EnhAc		H3K4me1_Enh
															E028	Epithelial	Breast variant Human Mammary Epithelial Cells (vHMEC)		18_EnhAc		H3K4me1_Enh
															E027	Epithelial	Breast Myoepithelial Primary Cells	7_Enh	14_EnhA2		H3K4me1_Enh
															E054	Neurosph	Ganglion Eminence derived primary cultured neurospheres	2_TssAFlnk	13_EnhA1		H3K4me1_Enh	H3K4me3_Pro
															E053	Neurosph	Cortex derived primary cultured neurospheres	7_Enh	14_EnhA2		H3K4me1_Enh	H3K4me3_Pro
															E112	Thymus	Thymus	7_Enh	14_EnhA2	H3K27ac_Enh	H3K4me1_Enh
															E093	Thymus	Fetal Thymus	7_Enh	13_EnhA1	H3K27ac_Enh	H3K4me1_Enh		DNase
															E071	Brain	Brain Hippocampus Middle	7_Enh	13_EnhA1	H3K27ac_Enh	H3K4me1_Enh	H3K4me3_Pro
															E074	Brain	Brain Substantia Nigra	7_Enh	13_EnhA1	H3K27ac_Enh	H3K4me1_Enh	H3K4me3_Pro
															E068	Brain	Brain Anterior Caudate	7_Enh	13_EnhA1	H3K27ac_Enh	H3K4me1_Enh	H3K4me3_Pro
															E069	Brain	Brain Cingulate Gyrus	7_Enh	13_EnhA1	H3K27ac_Enh	H3K4me1_Enh	H3K4me3_Pro
															E072	Brain	Brain Inferior Temporal Lobe		13_EnhA1	H3K27ac_Enh	H3K4me1_Enh	H3K4me3_Pro
															E067	Brain	Brain Angular Gyrus	7_Enh	13_EnhA1	H3K27ac_Enh	H3K4me1_Enh	H3K4me3_Pro
															E073	Brain	Brain_Dorsolateral_Prefrontal_Cortex	7_Enh	13_EnhA1	H3K27ac_Enh		H3K4me3_Pro
															E070	Brain	Brain Germinal Matrix		18_EnhAc
															E082	Brain	Fetal Brain Female		18_EnhAc
															E081	Brain	Fetal Brain Male		18_EnhAc		H3K4me1_Enh
															E063	Adipose	Adipose Nuclei		18_EnhAc
															E100	Muscle	Psoas Muscle		18_EnhAc		H3K4me1_Enh
															E108	Muscle	Skeletal Muscle Female		18_EnhAc	H3K27ac_Enh
															E107	Muscle	Skeletal Muscle Male		18_EnhAc		H3K4me1_Enh
															E089	Muscle	Fetal Muscle Trunk		15_EnhAF	H3K27ac_Enh	H3K4me1_Enh
															E090	Muscle	Fetal Muscle Leg	7_Enh	14_EnhA2	H3K27ac_Enh			DNase
															E083	Heart	Fetal Heart		18_EnhAc				DNase
															E104	Heart	Right Atrium		19_DNase	H3K27ac_Enh
															E095	Heart	Left Ventricle		18_EnhAc
															E105	Heart	Right Ventricle		18_EnhAc
															E065	Heart	Aorta		19_DNase	H3K27ac_Enh	H3K4me1_Enh
															E078	Sm. Muscle	Duodenum Smooth Muscle		15_EnhAF	H3K27ac_Enh	H3K4me1_Enh	H3K4me3_Pro
															E076	Sm. Muscle	Colon Smooth Muscle		15_EnhAF
															E103	Sm. Muscle	Rectal Smooth Muscle		18_EnhAc	H3K27ac_Enh	H3K4me1_Enh
															E111	Sm. Muscle	Stomach Smooth Muscle		18_EnhAc	H3K27ac_Enh	H3K4me1_Enh
															E092	Digestive	Fetal Stomach		15_EnhAF	H3K27ac_Enh	H3K4me1_Enh		DNase
															E085	Digestive	Fetal Intestine Small		18_EnhAc	H3K27ac_Enh	H3K4me1_Enh
															E084	Digestive	Fetal Intestine Large		14_EnhA2	H3K27ac_Enh
															E109	Digestive	Small Intestine		18_EnhAc	H3K27ac_Enh
															E106	Digestive	Sigmoid Colon		18_EnhAc	H3K27ac_Enh
															E075	Digestive	Colonic Mucosa		18_EnhAc	H3K27ac_Enh	H3K4me1_Enh
															E101	Digestive	Rectal Mucosa Donor 29		18_EnhAc	H3K27ac_Enh	H3K4me1_Enh
															E102	Digestive	Rectal Mucosa Donor 31		18_EnhAc	H3K27ac_Enh	H3K4me1_Enh
															E110	Digestive	Stomach Mucosa		15_EnhAF		H3K4me1_Enh
															E077	Digestive	Duodenum Mucosa		18_EnhAc
															E079	Digestive	Esophagus			H3K27ac_Enh
															E094	Digestive	Gastric		19_DNase
															E099	Other	Placenta Amnion		18_EnhAc
															E086	Other	Fetal Kidney		18_EnhAc		H3K4me1_Enh
															E088	Other	Fetal Lung		14_EnhA2
															E097	Other	Ovary		18_EnhAc	H3K27ac_Enh			DNase
															E087	Other	Pancreatic Islets		18_EnhAc	H3K27ac_Enh
															E080	Other	Fetal Adrenal Gland		18_EnhAc
															E091	Other	Placenta		15_EnhAF		H3K4me1_Enh
															E066	Other	Liver		18_EnhAc		H3K4me1_Enh
															E098	Other	Pancreas			H3K27ac_Enh
															E096	Other	Lung		19_DNase	H3K27ac_Enh	H3K4me1_Enh
															E113	Other	Spleen		17_EnhW2	H3K27ac_Enh
															E114	ENCODE2012	A549 EtOH 0.02pct Lung Carcinoma Cell Line		18_EnhAc		H3K4me1_Enh
															E115	ENCODE2012	Dnd41 TCell Leukemia Cell Line	2_TssAFlnk	2_PromU	H3K27ac_Enh	H3K4me1_Enh	H3K4me3_Pro
															E116	ENCODE2012	GM12878 Lymphoblastoid Cells	7_Enh	14_EnhA2
															E117	ENCODE2012	HeLa-S3 Cervical Carcinoma Cell Line		18_EnhAc		H3K4me1_Enh
															E118	ENCODE2012	HepG2 Hepatocellular Carcinoma Cell Line	2_TssAFlnk	13_EnhA1	H3K27ac_Enh	H3K4me1_Enh	H3K4me3_Pro	DNase
															E119	ENCODE2012	HMEC Mammary Epithelial Primary Cells	7_Enh	18_EnhAc				DNase
															E121	ENCODE2012	HSMM cell derived Skeletal Muscle Myotubes Cells		18_EnhAc
															E122	ENCODE2012	HUVEC Umbilical Vein Endothelial Primary Cells		18_EnhAc
															E123	ENCODE2012	K562 Leukemia Cells		15_EnhAF		H3K4me1_Enh
															E124	ENCODE2012	Monocytes-CD14+ RO01746 Primary Cells	2_TssAFlnk	13_EnhA1	H3K27ac_Enh	H3K4me1_Enh	H3K4me3_Pro	DNase
															E125	ENCODE2012	NH-A Astrocytes Primary Cells		14_EnhA2	H3K27ac_Enh		H3K4me3_Pro
															E126	ENCODE2012	NHDF-Ad Adult Dermal Fibroblast Primary Cells		18_EnhAc
															E127	ENCODE2012	NHEK-Epidermal Keratinocyte Primary Cells		18_EnhAc
															E129	ENCODE2012	Osteoblast Primary Cells		18_EnhAc	H3K27ac_Enh
rs55912899	21	48104004	A	G	5.895e-129	24.1597676481	0.9896	5.2298	PRMT2	downstream	18968	modifier	0.757	1.867	E049	Mesench			H3K27ac_Enh
rs2839314	21	47961067	A	G	1.882e-240	-33.1137867453	0.8674	4.0685	DIP2A	upstream	22506	modifier	0.457	1.812	E062	Blood & T-cell	Primary mononuclear cells from peripheral blood		11_TxEnh3	H3K27ac_Enh
															E045	Blood & T-cell	Primary T cells effector/memory enriched from peripheral blood		11_TxEnh3	H3K27ac_Enh	H3K4me1_Enh
															E033	Blood & T-cell	Primary T cells from cord blood		11_TxEnh3
															E044	Blood & T-cell	Primary T regulatory cells from peripheral blood		11_TxEnh3	H3K27ac_Enh	H3K4me1_Enh
															E043	Blood & T-cell	Primary T helper cells from peripheral blood	6_EnhG	11_TxEnh3	H3K27ac_Enh	H3K4me1_Enh
															E039	Blood & T-cell	Primary T helper naive cells from peripheral blood	6_EnhG	11_TxEnh3	H3K27ac_Enh	H3K4me1_Enh
															E041	Blood & T-cell	Primary T helper cells PMA-I stimulated	6_EnhG	11_TxEnh3	H3K27ac_Enh	H3K4me1_Enh
															E042	Blood & T-cell	Primary T helper 17 cells PMA-I stimulated	6_EnhG	11_TxEnh3		H3K4me1_Enh
															E040	Blood & T-cell	Primary T helper memory cells from peripheral blood 1	7_Enh	11_TxEnh3	H3K27ac_Enh	H3K4me1_Enh
															E037	Blood & T-cell	Primary T helper memory cells from peripheral blood 2	6_EnhG	11_TxEnh3	H3K27ac_Enh	H3K4me1_Enh
															E048	Blood & T-cell	Primary T CD8+ memory cells from peripheral blood	7_Enh	11_TxEnh3	H3K27ac_Enh	H3K4me1_Enh	H3K4me3_Pro
															E038	Blood & T-cell	Primary T helper naive cells from peripheral blood	6_EnhG	11_TxEnh3	H3K27ac_Enh	H3K4me1_Enh
															E047	Blood & T-cell	Primary T CD8+ naive cells from peripheral blood	7_Enh	11_TxEnh3	H3K27ac_Enh	H3K4me1_Enh	H3K4me3_Pro
															E046	HSC & B-cell	Primary Natural Killer cells from peripheral blood				H3K4me1_Enh
															E055	Epithelial	Foreskin Fibroblast Primary Cells skin01			H3K27ac_Enh
															E112	Thymus	Thymus		11_TxEnh3
															E071	Brain	Brain Hippocampus Middle		11_TxEnh3	H3K27ac_Enh
															E074	Brain	Brain Substantia Nigra		11_TxEnh3	H3K27ac_Enh
															E068	Brain	Brain Anterior Caudate
															E069	Brain	Brain Cingulate Gyrus				H3K4me1_Enh
															E072	Brain	Brain Inferior Temporal Lobe		11_TxEnh3	H3K27ac_Enh
															E067	Brain	Brain Angular Gyrus			H3K27ac_Enh
															E073	Brain	Brain_Dorsolateral_Prefrontal_Cortex		11_TxEnh3
															E089	Muscle	Fetal Muscle Trunk				H3K4me1_Enh
															E104	Heart	Right Atrium			H3K27ac_Enh
															E095	Heart	Left Ventricle				H3K4me1_Enh
															E105	Heart	Right Ventricle			H3K27ac_Enh	H3K4me1_Enh
															E124	ENCODE2012	Monocytes-CD14+ RO01746 Primary Cells			H3K27ac_Enh
rs62224256	21	47887095			1e-300		0.0	-25.7479	PCNT	downstream	21413	modifier	0.989	5.633	E008	ESC	H9 Cells			H3K27ac_Enh
															E013	ES-deriv	hESC Derived CD56+ Mesoderm Cultured Cells				H3K4me1_Enh
															E030	HSC & B-cell	Primary neutrophils from peripheral blood				H3K4me1_Enh
															E034	Blood & T-cell	Primary T cells from peripheral blood				H3K4me1_Enh
															E044	Blood & T-cell	Primary T regulatory cells from peripheral blood			H3K27ac_Enh
															E043	Blood & T-cell	Primary T helper cells from peripheral blood				H3K4me1_Enh
															E039	Blood & T-cell	Primary T helper naive cells from peripheral blood				H3K4me1_Enh
															E041	Blood & T-cell	Primary T helper cells PMA-I stimulated			H3K27ac_Enh	H3K4me1_Enh
															E048	Blood & T-cell	Primary T CD8+ memory cells from peripheral blood				H3K4me1_Enh
															E047	Blood & T-cell	Primary T CD8+ naive cells from peripheral blood				H3K4me1_Enh
															E050	HSC & B-cell	Primary hematopoietic stem cells G-CSF-mobilized Female			H3K27ac_Enh
															E061	Epithelial	Foreskin Melanocyte Primary Cells skin03				H3K4me1_Enh
															E071	Brain	Brain Hippocampus Middle				H3K4me1_Enh
															E109	Digestive	Small Intestine				H3K4me1_Enh
															E124	ENCODE2012	Monocytes-CD14+ RO01746 Primary Cells			H3K27ac_Enh

## Sheet: Sheet2
Enhancer
Lead_SNP	LD_r2	SNP	BP_orig	CHR	A1	A2	FRQ	INFO	BETA	SE	P	GHid	enhScore	enhElite
rs62224256	0.09(D'=0.48)	rs11910707	48042513	21	T	G	0.3081	0.9682	0.4773	0.0152	1.261e-205	GH21G046620	1.707122617	1
	0.13(D'=0.53)	rs2839314	47961067	21	A	G	0.6694	0.9947	-0.4978	0.0145	1.882e-240	GH21G046541	0.511944871	0

## Sheet: Sheet3
Enhancer
GHid	symbol	eqtl_score	erna_score	chic_score	expression_score	enhancer_gene_distance	distance_score	combined_score	is_elite	eqtl_tissue
GH21G046620	PRMT2	8.72585e-07	0.002838774	NA	NA	-13303	0.389545444524	7.6772056648	1	Artery - Aorta
GH21G046620	S100B	2.29873e-21	NA	NA	NA	-16643	0.359569718714	20.998081755	1	Adipose - Visceral (Omentum)
GH21G046620	DIP2A	NA	5.427129e-05	NA	NA	162952	0.0882129550872	4.35364281043	0	NA
GH21G046620	SPATC1L	5.75219e-12	NA	NA	NA	-436702	0.0359060085045	11.2760727858	0	Cells - Transformed fibroblasts
GH21G046541	RNU6-396P	NA	NA	NA	NA	16481	0.359569718714	0.359569718714	0	NA
GH21G046541	S100B	1.61677e-13	NA	11.5818828654	NA	63110	0.201907593629	24.575142217	1	Adipose - Subcutaneous
GH21G046541	DIP2A-IT1	NA	NA	11.5590964967	NA	79628	0.17545297317	11.7345494699	0	NA
GH21G046541	DIP2A	2.3804e-35	NA	11.5590964967	NA	83200	0.167206173797	46.3496527289	1	Whole Blood
GH21G046541	MCM3AP	3.53698e-13	NA	NA	NA	-255540	0.0585615416125	12.5099289375	0	Artery - Tibial
GH21G046541	MCM3AP-AS1	3.58064e-09	NA	NA	NA	312882	0.0474885918931	8.49352793295	0	Artery - Tibial
GH21G046541	SPATC1L	2.85357e-18	NA	NA	NA	-356950	0.0418362911994	17.5864477606	0	Whole Blood

## Sheet: Sheet4
Enhancer
GHid	source	tissue
GH21G046620	dbSUPER	Brain - Angular gyrus
GH21G046620	dbSUPER	Brain - Anterior caudate
GH21G046620	dbSUPER	Brain - Cingulate gyrus
GH21G046620	dbSUPER	Brain - Hippocampus middle
GH21G046620	dbSUPER	Brain - Inferior temporal lobe
GH21G046620	dbSUPER	CD8 naive primary cells
GH21G046620	ENCODE	HepG2
GH21G046620	ENCODE	B cell
GH21G046620	ENCODE	CD14-positive monocyte
GH21G046620	ENCODE	common myeloid progenitor, CD34-positive
GH21G046620	ENCODE	foreskin melanocyte
GH21G046620	ENCODE	natural killer cell
GH21G046620	ENCODE	T-cell
GH21G046620	ENCODE	neuronal stem cell
GH21G046620	ENCODE	female gonad
GH21G046620	ENCODE	large intestine
GH21G046620	ENCODE	muscle of leg
GH21G046620	ENCODE	muscle of trunk
GH21G046620	ENCODE	pancreas
GH21G046620	ENCODE	small intestine
GH21G046620	ENCODE	stomach
GH21G046620	ENCODE	thymus
GH21G046620	FANTOM5	melanocyte
GH21G046620	FANTOM5	T cell
GH21G046451	ENCODE	adrenal gland
GH21G046451	ENCODE	large intestine
GH21G046451	ENCODE	small intestine

## Sheet: Sheet5
Sherlock, colocalization with GTEx v6
Lead_SNP	LD_r2	SNP	P	CHR	BP	GENE	cP	LBF	eP	Mode	Tiss
rs62224256	0.02(D'=0.62)	rs34686582	3.613e-20	21	46340984	COL6A2	2.0016e-06	7.312	7.54235e-06	cis	Nerve_Tibial
	0.01(D'=0.20)	rs9978055	3.405e-14	21	46343454	COL6A2	2.05312e-05	6.72708	4.11476e-06	cis	Muscle_Skeletal
	0.07(D'=0.67)	rs17272671	4.935e-13	21	46367062	FTCD	1.80144e-05	6.37772	6.39761e-05	cis	Nerve_Tibial
	0.07(D'=0.67)	rs17357592	4.926e-13	21	46367207	COL6A2	1.30924e-05	6.79595	1.782e-06	cis	Whole_Blood
	0.0(D'=0.0)	rs7280485	1.241e-12	21	46372775	FTCD	4.4843e-05	6.38904	4.63877e-05	cis	Uterus
	0.02(D'=0.49)	rs3088026	2.689e-15	21	46374041	LSS	4.14508e-05	6.64465	4.15609e-05	cis	Brain_Hypothalamus
	0.07(D'=0.65)	rs6652	9.39e-13	21	46376813	FTCD	1.1773e-05	7.05312	3.97785e-08	cis	Artery_Tibial
	0.04(D'=0.33)	rs1980983	2.418e-33	21	46383422	COL6A2	1.77962e-05	6.52239	5.00302e-05	cis	Skin_Not_Sun_Exposed_Suprapubic
	0.04(D'=0.33)	rs1980983	2.418e-33	21	46383422	COL6A2	1.95103e-05	6.06411	9.98634e-05	cis	Testis
	0.02(D'=0.52)	rs11089051	1.994e-22	21	46401204	SPATC1L	3.39789e-05	6.96037	2.16572e-06	cis	Brain_Hippocampus
	0.02(D'=0.53)	rs11908812	8.014e-22	21	46402058	SPATC1L	2.331e-05	6.9284	4.06532e-06	cis	Brain_Caudate_basal_ganglia
	0.02(D'=0.53)	rs11908812	8.014e-22	21	46402058	SPATC1L	2.54259e-05	7.00867	8.19593e-06	cis	Brain_Nucleus_accumbens_basal_ganglia
	0.01(D'=0.20)	rs2839130	1.392e-12	21	46415556	DSTNP1	1.72592e-06	7.40344	1.43913e-06	cis	Adipose_Visceral_Omentum
	0.01(D'=0.20)	rs2839134	1.427e-12	21	46416210	PRMT2	6.90369e-06	7.25787	3.92829e-06	cis	Adipose_Visceral_Omentum
	0.01(D'=0.20)	rs13048940	3.484e-12	21	46417325	FTCD	2.07111e-05	6.45733	1.59159e-06	cis	Adipose_Visceral_Omentum
	0.01(D'=0.20)	rs13048940	3.484e-12	21	46417325	MCM3AP-AS1	1.2832e-06	7.18453	2.22548e-06	cis	Muscle_Skeletal
	0.01(D'=0.20)	rs9977373	9.207e-13	21	46419688	FTCD	9.19329e-06	7.18588	1.97122e-09	cis	Brain_Cortex
	0.01(D'=0.20)	rs9977373	9.207e-13	21	46419688	FTCD	2.05973e-05	7.11653	3.37462e-09	cis	Brain_Frontal_Cortex_BA9
	0.01(D'=0.20)	rs9977373	9.207e-13	21	46419688	FTCD-AS1	2.24618e-05	6.92907	1.76746e-05	cis	Esophagus_Gastroesophageal_Junction
	0.01(D'=0.21)	rs8133866	7.85e-15	21	46423604	FTCD-AS1	1.69851e-05	6.94493	3.55531e-06	cis	Artery_Aorta
	0.01(D'=0.21)	rs8133866	7.85e-15	21	46423604	FTCD	9.43174e-06	7.31731	4.0668e-13	cis	Artery_Coronary
	0.01(D'=0.21)	rs8133866	7.85e-15	21	46423604	FTCD-AS1	2.82952e-05	6.86416	1.70608e-05	cis	Artery_Coronary
	0.01(D'=0.21)	rs8133866	7.85e-15	21	46423604	FTCD	1.8648e-05	7.22085	1.20599e-10	cis	Brain_Caudate_basal_ganglia
	0.01(D'=0.21)	rs8133866	7.85e-15	21	46423604	FTCD-AS1	2.331e-05	7.02816	6.80228e-07	cis	Brain_Caudate_basal_ganglia
	0.01(D'=0.21)	rs8133866	7.85e-15	21	46423604	FTCD	2.849e-05	7.07768	3.98262e-12	cis	Brain_Cerebellar_Hemisphere
	0.01(D'=0.21)	rs8133866	7.85e-15	21	46423604	FTCD-AS1	2.08587e-05	7.36447	1.26812e-08	cis	Brain_Cerebellum
	0.01(D'=0.21)	rs8133866	7.85e-15	21	46423604	FTCD	3.1288e-05	7.11684	1.41014e-12	cis	Brain_Cerebellum
	0.01(D'=0.21)	rs8133866	7.85e-15	21	46423604	FTCD	2.54259e-05	7.028	1.27789e-12	cis	Brain_Nucleus_accumbens_basal_ganglia
	0.01(D'=0.21)	rs8133866	7.85e-15	21	46423604	FTCD-AS1	4.06814e-05	6.35589	6.43569e-05	cis	Brain_Nucleus_accumbens_basal_ganglia
	0.01(D'=0.21)	rs8133866	7.85e-15	21	46423604	FTCD	3.53878e-05	6.69586	2.33914e-06	cis	Brain_Putamen_basal_ganglia
	0.01(D'=0.21)	rs8133866	7.85e-15	21	46423604	FTCD	2.60473e-05	6.80076	1.3845e-13	cis	Colon_Sigmoid
	0.01(D'=0.21)	rs8133866	7.85e-15	21	46423604	FTCD-AS1	3.03885e-05	6.25945	1.16534e-06	cis	Colon_Sigmoid
	0.01(D'=0.21)	rs8133866	7.85e-15	21	46423604	FTCD-AS1	1.98939e-05	6.57616	3.81854e-05	cis	Colon_Transverse
	0.01(D'=0.21)	rs8133866	7.85e-15	21	46423604	FTCD	2.24618e-05	6.64199	6.11238e-14	cis	Esophagus_Gastroesophageal_Junction
	0.01(D'=0.21)	rs8133866	7.85e-15	21	46423604	FTCD	1.73943e-05	7.15744	3.86151e-11	cis	Heart_Left_Ventricle
	0.01(D'=0.21)	rs8133866	7.85e-15	21	46423604	SPATC1L	4.92156e-05	6.01425	5.03404e-05	cis	Liver
	0.01(D'=0.21)	rs8133866	7.85e-15	21	46423604	SPATC1L	2.90782e-05	6.96928	3.80917e-15	cis	Ovary
	0.01(D'=0.21)	rs8133866	7.85e-15	21	46423604	FTCD-AS1	2.90782e-05	6.9262	1.22443e-06	cis	Ovary
	0.00(D'=0.12)	rs8133205	3.605e-20	21	46423708	FTCD	1.11359e-05	6.72378	2.28245e-21	cis	Adipose_Subcutaneous
	0.00(D'=0.12)	rs8133205	3.605e-20	21	46423708	SPATC1L	1.72592e-05	6.88429	5.02309e-22	cis	Adipose_Visceral_Omentum
	0.00(D'=0.12)	rs8133205	3.605e-20	21	46423708	SPATC1L	2.44051e-05	7.04183	2.67057e-14	cis	Adrenal_Gland
	0.00(D'=0.12)	rs8133205	3.605e-20	21	46423708	FTCD	2.44051e-05	6.49275	1.88443e-07	cis	Adrenal_Gland
	0.00(D'=0.12)	rs8133205	3.605e-20	21	46423708	FTCD	2.26469e-05	6.57115	3.34589e-16	cis	Artery_Aorta
	0.00(D'=0.12)	rs8133205	3.605e-20	21	46423708	SPATC1L	2.82952e-05	7.09462	2.23173e-19	cis	Artery_Coronary
	0.00(D'=0.12)	rs8133205	3.605e-20	21	46423708	FTCD-AS1	4.6344e-05	6.23132	8.12991e-05	cis	Brain_Frontal_Cortex_BA9
	0.00(D'=0.12)	rs8133205	3.605e-20	21	46423708	SPATC1L	6.80735e-06	7.21855	5.12936e-29	cis	Breast_Mammary_Tissue
	0.00(D'=0.12)	rs8133205	3.605e-20	21	46423708	SPATC1L	1.77148e-05	6.40949	4.64041e-08	cis	Cells_EBV-transformed_lymphocytes
	0.00(D'=0.12)	rs8133205	3.605e-20	21	46423708	SPATC1L	2.25276e-06	7.22546	8.28212e-38	cis	Cells_Transformed_fibroblasts
	0.00(D'=0.12)	rs8133205	3.605e-20	21	46423708	FTCD	1.12638e-05	6.82688	7.42875e-11	cis	Cells_Transformed_fibroblasts
	0.00(D'=0.12)	rs8133205	3.605e-20	21	46423708	SPATC1L	2.60473e-05	7.11298	5.25008e-15	cis	Colon_Sigmoid
	0.00(D'=0.12)	rs8133205	3.605e-20	21	46423708	SPATC1L	1.65782e-05	7.05615	4.70132e-27	cis	Colon_Transverse
	0.00(D'=0.12)	rs8133205	3.605e-20	21	46423708	FTCD	1.98939e-05	6.75703	6.72774e-14	cis	Colon_Transverse
	0.00(D'=0.12)	rs8133205	3.605e-20	21	46423708	SPATC1L	2.24618e-05	6.81389	1.21619e-15	cis	Esophagus_Gastroesophageal_Junction
	0.00(D'=0.12)	rs8133205	3.605e-20	21	46423708	FTCD	1.7452e-05	6.59097	1.45337e-12	cis	Esophagus_Mucosa
	0.00(D'=0.12)	rs8133205	3.605e-20	21	46423708	FTCD	7.30327e-06	7.41368	5.48743e-08	cis	Heart_Atrial_Appendage
	0.00(D'=0.12)	rs8133205	3.605e-20	21	46423708	SPATC1L	2.92131e-05	6.79702	2.45276e-14	cis	Heart_Atrial_Appendage
	0.00(D'=0.12)	rs8133205	3.605e-20	21	46423708	SPATC1L	3.13098e-05	6.93212	9.51252e-23	cis	Heart_Left_Ventricle
	0.00(D'=0.12)	rs8133205	3.605e-20	21	46423708	FTCD	1.44718e-05	7.01448	5.96721e-14	cis	Lung
	0.00(D'=0.12)	rs8133205	3.605e-20	21	46423708	FTCD	5.13281e-06	7.1607	1.91716e-22	cis	Muscle_Skeletal
	0.00(D'=0.12)	rs8133205	3.605e-20	21	46423708	SPATC1L	8.00641e-06	7.1209	4.86327e-33	cis	Nerve_Tibial
	0.00(D'=0.12)	rs8133205	3.605e-20	21	46423708	FTCD	2.90782e-06	7.46709	3.9221e-12	cis	Ovary
	0.00(D'=0.12)	rs8133205	3.605e-20	21	46423708	SPATC1L	2.13904e-05	7.00717	8.59904e-25	cis	Pancreas
	0.00(D'=0.12)	rs8133205	3.605e-20	21	46423708	SPATC1L	1.48302e-05	7.06761	7.55609e-20	cis	Skin_Not_Sun_Exposed_Suprapubic
	0.00(D'=0.12)	rs8133205	3.605e-20	21	46423708	FTCD	1.77962e-05	6.93165	3.32486e-09	cis	Skin_Not_Sun_Exposed_Suprapubic
	0.00(D'=0.12)	rs8133205	3.605e-20	21	46423708	FTCD	4.33651e-06	7.06061	4.83518e-17	cis	Skin_Sun_Exposed_Lower_leg
	0.00(D'=0.12)	rs8133205	3.605e-20	21	46423708	SPATC1L	3.11236e-05	6.93259	3.33708e-08	cis	Small_Intestine_Terminal_Ileum
	0.00(D'=0.12)	rs8133205	3.605e-20	21	46423708	SPATC1L	1.79816e-05	7.25637	3.24826e-12	cis	Spleen
	0.00(D'=0.12)	rs8133205	3.605e-20	21	46423708	FTCD	2.2477e-05	6.39578	3.40169e-06	cis	Spleen
	0.00(D'=0.12)	rs8133205	3.605e-20	21	46423708	FTCD	7.60601e-06	7.22121	8.09649e-12	cis	Stomach
	0.00(D'=0.12)	rs8133205	3.605e-20	21	46423708	SPATC1L	1.5212e-05	7.01066	6.91451e-20	cis	Stomach
	0.00(D'=0.12)	rs8133205	3.605e-20	21	46423708	SPATC1L	3.73692e-05	6.86809	3.68824e-07	cis	Uterus
	0.00(D'=0.12)	rs8133205	3.605e-20	21	46423708	S100B	4.4843e-05	6.36424	1.34225e-05	cis	Uterus
	0.00(D'=0.12)	rs8133205	3.605e-20	21	46423708	SPATC1L	2.18341e-05	6.95346	2.36748e-13	cis	Vagina
	0.00(D'=0.12)	rs8133205	3.605e-20	21	46423708	FTCD	4.36681e-05	6.77128	5.47881e-07	cis	Vagina
	0.00(D'=0.12)	rs8133205	3.605e-20	21	46423708	FTCD	1.30924e-05	6.51431	1.79268e-05	cis	Whole_Blood
	0.03(D'=0.55)	rs12482934	3.508e-24	21	46429763	C21orf58	2.44051e-05	6.21118	8.69769e-05	cis	Adrenal_Gland
	0.03(D'=0.55)	rs12482934	3.508e-24	21	46429763	SPATC1L	2.849e-05	7.18719	5.43973e-08	cis	Brain_Cerebellar_Hemisphere
	0.03(D'=0.55)	rs12482934	3.508e-24	21	46429763	SPATC1L	3.45423e-05	7.23038	4.80789e-07	cis	Brain_Hypothalamus
	0.11(D'=0.44)	rs914247	5.542e-64	21	46434105	COL6A2	2.71831e-05	7.05569	1.15036e-06	cis	Brain_Hippocampus
	0.11(D'=0.44)	rs914247	5.542e-64	21	46434105	PCNT	1.32861e-05	7.17473	2.8016e-06	cis	Cells_EBV-transformed_lymphocytes
	0.11(D'=0.44)	rs914247	5.542e-64	21	46434105	MCM3AP-AS1	1.44718e-05	6.88323	7.37654e-08	cis	Lung
	0.11(D'=0.44)	rs2330408	4.515e-64	21	46434494	MCM3AP-AS1	9.01104e-06	7.02673	2.07697e-06	cis	Cells_Transformed_fibroblasts
	0.11(D'=0.44)	rs2330408	4.515e-64	21	46434494	MCM3AP-AS1	1.65782e-06	7.46434	1.61121e-07	cis	Colon_Transverse
	0.07(D'=0.67)	rs2277824	1.522e-13	21	46439088	LSS	1.98939e-05	6.40472	5.2845e-05	cis	Colon_Transverse
	0.11(D'=0.44)	rs4819214	2.408e-63	21	46444212	MCM3AP-AS1	1.1773e-06	7.30486	3.91054e-12	cis	Artery_Tibial
	0.11(D'=0.44)	rs4819214	2.408e-63	21	46444212	MCM3AP	3.1288e-05	6.19637	7.18943e-05	cis	Brain_Cerebellum
	0.11(D'=0.44)	rs4819214	2.408e-63	21	46444212	MCM3AP-AS1	1.06952e-05	7.25487	1.3183e-06	cis	Pancreas
	0.11(D'=0.44)	rs4819214	2.408e-63	21	46444212	MCM3AP-AS1	1.08413e-06	7.44918	6.19712e-13	cis	Skin_Sun_Exposed_Lower_leg
	0.11(D'=0.44)	rs4819214	2.408e-63	21	46444212	MCM3AP-AS1	3.0424e-05	6.7085	6.34308e-07	cis	Stomach
	0.00(D'=0.06)	rs2839143	7.294e-24	21	46450086	MCM3AP-AS1	1.48441e-05	7.14553	2.90528e-06	cis	Pituitary
	0.00(D'=0.18)	rs2839149	9.461e-12	21	46457008	SPATC1L	1.75593e-05	6.44728	1.10202e-06	cis	Testis
	0.07(D'=0.70)	rs2839153	8.246e-14	21	46460284	LSS	2.13904e-05	7.09593	1.99028e-06	cis	Pancreas
	0.07(D'=0.70)	rs2839153	8.246e-14	21	46460284	YBEY	7.27802e-06	7.34148	5.25161e-11	cis	Vagina
	0.16(D'=0.48)	rs2277826	4.382e-66	21	46463920	MCM3AP-AS1	1.72592e-05	6.91223	3.87256e-08	cis	Adipose_Visceral_Omentum
	0.16(D'=0.48)	rs2277826	4.382e-66	21	46463920	MCM3AP-AS1	5.66171e-06	7.17015	1.68857e-07	cis	Artery_Aorta
	0.16(D'=0.48)	rs2277826	4.382e-66	21	46463920	MCM3AP-AS1	2.38257e-05	6.21887	6.66989e-05	cis	Breast_Mammary_Tissue
	0.16(D'=0.48)	rs2277826	4.382e-66	21	46463920	MCM3AP-AS1	1.30924e-05	6.84629	1.39749e-06	cis	Whole_Blood
	0.07(D'=0.69)	rs2839156	1.605e-13	21	46465624	PCNT	1.30095e-05	6.7205	1.30599e-05	cis	Skin_Sun_Exposed_Lower_leg
	0.08(D'=0.29)	rs2280958	1.633e-94	21	46466444	LSS	1.82582e-06	7.52401	2.22138e-11	cis	Heart_Atrial_Appendage
	0.18(D'=0.46)	rs915804	1.828e-108	21	46474230	SPATC1L	5.13281e-06	7.15988	2.12291e-20	cis	Muscle_Skeletal
	0.01(D'=0.17)	rs2839159	4.321e-24	21	46476371	LSS	1.72592e-05	6.68981	8.32639e-06	cis	Adipose_Visceral_Omentum
	0.18(D'=0.46)	rs2839160	2.364e-111	21	46476613	FTCD	2.71831e-05	7.20156	1.83815e-06	cis	Brain_Hippocampus
	0.18(D'=0.46)	rs2839160	2.364e-111	21	46476613	SPATC1L	3.53878e-05	6.43605	3.89455e-05	cis	Brain_Putamen_basal_ganglia
	0.18(D'=0.46)	rs2839160	2.364e-111	21	46476613	SPATC1L	1.97922e-05	6.97766	3.9459e-07	cis	Pituitary
	0.18(D'=0.46)	rs2839160	2.364e-111	21	46476613	SPATC1L	1.08413e-06	7.33446	2.54739e-23	cis	Skin_Sun_Exposed_Lower_leg
	0.18(D'=0.46)	rs9984708	3.426e-111	21	46478132	SPATC1L	3.1288e-05	7.17406	3.79763e-10	cis	Brain_Cerebellum
	0.01(D'=0.13)	rs2298695	7.434e-60	21	46479455	LSS	1.1773e-06	7.25584	7.23548e-07	cis	Artery_Tibial
	0.01(D'=0.13)	rs2298695	7.434e-60	21	46479455	LSS	3.53878e-05	6.33677	4.46997e-05	cis	Brain_Putamen_basal_ganglia
	0.01(D'=0.13)	rs2298695	7.434e-60	21	46479455	LSS	1.0008e-05	7.0481	5.74302e-08	cis	Nerve_Tibial
	0.01(D'=0.13)	rs2298695	7.434e-60	21	46479455	MCM3AP	1.97922e-05	7.04249	9.33372e-07	cis	Pituitary
	0.01(D'=0.13)	rs2839166	1.398e-60	21	46481140	LSS	3.39789e-05	6.6009	4.13829e-05	cis	Brain_Hippocampus
	0.01(D'=0.13)	rs2839166	1.398e-60	21	46481140	LSS	1.04366e-05	7.26648	6.51325e-10	cis	Heart_Left_Ventricle
	0.01(D'=0.13)	rs2839166	1.398e-60	21	46481140	LSS	4.82393e-06	7.26966	2.93887e-08	cis	Lung
	0.0(D'=0.05)	rs2839168	1.119e-42	21	46486043	LSS	1.35166e-05	6.58654	7.08351e-06	cis	Cells_Transformed_fibroblasts
	0.0(D'=0.05)	rs2839168	1.119e-42	21	46486043	LSS	2.24618e-05	6.22799	7.39767e-05	cis	Esophagus_Gastroesophageal_Junction
	0.0(D'=0.05)	rs2839168	1.119e-42	21	46486043	LSS	7.92288e-06	7.19065	3.73255e-11	cis	Esophagus_Muscularis
	0.0(D'=0.05)	rs1060609	2.688e-42	21	46486874	LSS	2.83086e-06	7.25559	7.20986e-12	cis	Artery_Aorta
	0.0(D'=0.05)	rs1060609	2.688e-42	21	46486874	LSS	2.04221e-05	6.79506	3.4388e-06	cis	Breast_Mammary_Tissue
	0.0(D'=0.05)	rs1060609	2.688e-42	21	46486874	LSS	2.2477e-05	7.00388	1.60409e-07	cis	Spleen
	0.00(D'=0.20)	rs2839169	3.607e-13	21	46490760	MCM3AP	1.2832e-06	7.24534	8.13088e-09	cis	Muscle_Skeletal
	0.07(D'=0.30)	rs2250213	4.054e-80	21	46498703	YBEY	2.41196e-06	7.54372	3.47567e-23	cis	Lung
	0.17(D'=0.50)	rs2839174	8.636e-66	21	46501362	MCM3AP	1.95103e-06	7.46665	4.07598e-13	cis	Testis
	0.02(D'=0.25)	rs2839179	6.008e-23	21	46505469	MCM3AP	2.94898e-05	7.0488	8.20656e-07	cis	Brain_Putamen_basal_ganglia
	0.10(D'=0.33)	rs2839181	7.914e-97	21	46510367	YBEY	2.35793e-06	7.5163	6.15084e-13	cis	Artery_Coronary
	0.02(D'=0.17)	rs2839183	1.399e-55	21	46511572	MCM3AP	1.11359e-06	7.38823	8.21118e-18	cis	Adipose_Subcutaneous
	0.02(D'=0.17)	rs2839183	1.399e-55	21	46511572	LSS	9.43174e-06	7.32271	1.4747e-06	cis	Artery_Coronary
	0.02(D'=0.17)	rs2839183	1.399e-55	21	46511572	MCM3AP	2.0016e-06	7.32378	4.71185e-14	cis	Nerve_Tibial
	0.02(D'=0.17)	rs2839183	1.399e-55	21	46511572	MCM3AP	1.5212e-05	6.99051	3.5534e-07	cis	Stomach
	0.14(D'=0.50)	rs2839184	2.263e-65	21	46513441	MCM3AP	1.12638e-06	7.38513	1.20039e-14	cis	Cells_Transformed_fibroblasts
	0.14(D'=0.50)	rs2839184	2.263e-65	21	46513441	MCM3AP-AS1	1.75593e-05	6.37595	3.46595e-05	cis	Testis
	0.11(D'=0.34)	rs2839186	1.94e-97	21	46514496	YBEY	2.48988e-05	7.26479	3.01961e-12	cis	Small_Intestine_Terminal_Ileum
	0.06(D'=0.67)	rs2839187	2.583e-15	21	46515377	PCNT	1.36147e-05	7.0802	1.70706e-05	cis	Breast_Mammary_Tissue
	0.06(D'=0.67)	rs2839187	2.583e-15	21	46515377	YBEY	7.47384e-06	7.3765	7.65834e-10	cis	Uterus
	0.07(D'=0.42)	rs2839193	6.632e-70	21	46522771	FTCD	2.13904e-05	7.04283	1.73419e-05	cis	Pancreas
	0.11(D'=0.35)	rs2839194	4.995e-98	21	46523865	YBEY	1.30924e-06	7.52185	2.06602e-21	cis	Whole_Blood
	0.02(D'=0.17)	rs11702450	1.42e-56	21	46528077	MCM3AP-AS1	4.45434e-06	6.99174	4.4985e-09	cis	Adipose_Subcutaneous
	0.02(D'=0.17)	rs11702450	1.42e-56	21	46528077	MCM3AP-AS1	1.77148e-05	6.65868	1.38299e-06	cis	Cells_EBV-transformed_lymphocytes
	0.02(D'=0.17)	rs11702450	1.42e-56	21	46528077	MCM3AP	5.28192e-06	7.31766	1.64433e-11	cis	Esophagus_Muscularis
	0.02(D'=0.17)	rs11702450	1.42e-56	21	46528077	MCM3AP	3.47887e-06	7.41109	2.04723e-12	cis	Heart_Left_Ventricle
	0.02(D'=0.17)	rs11702450	1.42e-56	21	46528077	MCM3AP-AS1	3.47887e-06	7.34805	4.54203e-10	cis	Heart_Left_Ventricle
	0.02(D'=0.17)	rs11702450	1.42e-56	21	46528077	MCM3AP-AS1	1.20096e-05	6.71433	6.34516e-07	cis	Nerve_Tibial
	0.02(D'=0.17)	rs9975588	5.188e-58	21	46529324	MCM3AP-AS1	2.64096e-06	7.41887	2.43536e-09	cis	Esophagus_Muscularis
	0.10(D'=0.32)	rs2839196	1.2e-98	21	46532465	MCM3AP	1.06952e-05	7.25222	1.24448e-09	cis	Pancreas
	0.10(D'=0.32)	rs2839196	1.2e-98	21	46532465	MCM3AP-AS1	2.96604e-06	7.3119	6.54561e-09	cis	Skin_Not_Sun_Exposed_Suprapubic
	0.11(D'=0.35)	rs2839197	2.136e-98	21	46532561	MCM3AP	1.48302e-06	7.44561	7.34696e-12	cis	Skin_Not_Sun_Exposed_Suprapubic
	0.16(D'=0.55)	rs4819225	1.521e-72	21	46536613	MCM3AP	3.40368e-06	7.31269	2.90227e-09	cis	Breast_Mammary_Tissue
	0.16(D'=0.55)	rs4819225	1.521e-72	21	46536613	MCM3AP	4.82393e-06	7.29314	3.89589e-11	cis	Lung
	0.16(D'=0.55)	rs4819225	1.521e-72	21	46536613	MCM3AP-AS1	1.34862e-05	7.32719	3.16269e-08	cis	Spleen
	0.16(D'=0.55)	rs4819225	1.521e-72	21	46536613	MCM3AP	1.79816e-05	7.21692	1.83802e-09	cis	Spleen
	0.16(D'=0.55)	rs4819225	1.521e-72	21	46536613	MCM3AP	1.30924e-06	7.26416	6.70014e-11	cis	Whole_Blood
	0.0(D'=0.02)	rs12626184	2.539e-12	21	46539724	YBEY	8.14001e-06	7.45165	5.97188e-10	cis	Brain_Cerebellar_Hemisphere
	0.0(D'=0.02)	rs12626184	2.539e-12	21	46539724	YBEY	4.59664e-06	7.42739	6.54853e-10	cis	Brain_Cortex
	0.0(D'=0.02)	rs12626184	2.539e-12	21	46539724	YBEY	2.57467e-05	6.91942	4.26927e-11	cis	Brain_Frontal_Cortex_BA9
	0.0(D'=0.02)	rs12626184	2.539e-12	21	46539724	YBEY	2.54259e-06	7.47845	1.43623e-11	cis	Brain_Nucleus_accumbens_basal_ganglia
	0.21(D'=0.53)	rs2839201	3.781e-34	21	46540022	PCNT	1.83866e-05	6.89575	2.36772e-05	cis	Brain_Cortex
	0.00(D'=0.02)	rs11089056	2.849e-12	21	46544785	LSS	1.2832e-06	7.42533	3.56091e-08	cis	Muscle_Skeletal
	0.00(D'=0.03)	rs3747007	1.683e-13	21	46546167	YBEY	2.331e-06	7.43045	1.59772e-11	cis	Brain_Caudate_basal_ganglia
	0.00(D'=0.03)	rs3747007	1.683e-13	21	46546167	C21orf58	1.73822e-06	7.50211	1.38398e-09	cis	Brain_Cerebellum
	0.00(D'=0.03)	rs3747007	1.683e-13	21	46546167	YBEY	1.04293e-05	7.39124	1.10332e-12	cis	Brain_Cerebellum
	0.00(D'=0.03)	rs3747007	1.683e-13	21	46546167	YBEY	2.17061e-06	7.49812	4.56356e-18	cis	Colon_Sigmoid
	0.00(D'=0.03)	rs3747007	1.683e-13	21	46546167	YBEY	2.24618e-06	7.45934	3.04606e-17	cis	Esophagus_Gastroesophageal_Junction
	0.00(D'=0.03)	rs3747007	1.683e-13	21	46546167	YBEY	1.16313e-05	7.38812	1.39598e-11	cis	Ovary
	0.00(D'=0.03)	rs3747007	1.683e-13	21	46546167	YBEY	4.94805e-06	7.40763	6.90266e-17	cis	Pituitary
	0.00(D'=0.03)	rs3747007	1.683e-13	21	46546167	YBEY	1.17578e-05	7.37819	3.26924e-09	cis	Prostate
	0.1(D'=0.75)	rs11701725	4.532e-27	21	46547553	YBEY	1.70184e-06	7.49034	3.26206e-17	cis	Breast_Mammary_Tissue
	0.1(D'=0.75)	rs11701725	4.532e-27	21	46547553	YBEY	1.09549e-05	7.38991	2.89812e-18	cis	Heart_Atrial_Appendage
	0.10(D'=0.76)	rs13049522	4.698e-27	21	46555923	YBEY	4.06752e-06	7.41462	7.87591e-13	cis	Adrenal_Gland
	0.10(D'=0.76)	rs13049522	4.698e-27	21	46555923	YBEY	3.45423e-06	7.56161	3.30015e-14	cis	Brain_Hypothalamus
	0.10(D'=0.76)	rs13049522	4.698e-27	21	46555923	YBEY	1.17959e-05	7.41837	6.34512e-12	cis	Brain_Putamen_basal_ganglia
	0.10(D'=0.76)	rs13049522	4.698e-27	21	46555923	YBEY	1.2832e-06	7.32924	2.2157e-24	cis	Muscle_Skeletal
	0.10(D'=0.76)	rs13049522	4.698e-27	21	46555923	PCNT	8.00641e-06	7.12239	9.3488e-09	cis	Nerve_Tibial
	0.09(D'=0.47)	rs2839210	2.328e-58	21	46560163	FTCD	4.97977e-05	6.23763	2.29316e-05	cis	Small_Intestine_Terminal_Ileum
	0.10(D'=0.75)	rs4819236	2.295e-26	21	46563574	PCNT	1.11359e-06	7.22387	1.36618e-07	cis	Adipose_Subcutaneous
	0.10(D'=0.75)	rs4819236	2.295e-26	21	46563574	PCNT	1.72592e-06	7.43775	2.97527e-09	cis	Adipose_Visceral_Omentum
	0.10(D'=0.75)	rs4819236	2.295e-26	21	46563574	PCNT	1.41276e-05	7.02046	3.15765e-06	cis	Artery_Tibial
	0.10(D'=0.75)	rs4819236	2.295e-26	21	46563574	YBEY	1.06952e-05	7.40817	3.40733e-14	cis	Pancreas
	0.23(D'=0.61)	rs9980536	1.756e-94	21	46586802	MCM3AP	2.21435e-06	7.47624	4.87164e-10	cis	Cells_EBV-transformed_lymphocytes
	0.02(D'=0.19)	rs2839217	8.501e-47	21	46591078	MCM3AP-AS1	3.28647e-05	6.28917	2.80022e-05	cis	Heart_Atrial_Appendage
	0.15(D'=0.98)	rs2839222	1.343e-55	21	46601134	YBEY	1.48302e-06	7.47817	4.60387e-20	cis	Skin_Not_Sun_Exposed_Suprapubic
	0.24(D'=0.98)	rs2839226	5.844e-14	21	46610922	LSS	1.30095e-05	6.81297	1.04248e-05	cis	Skin_Sun_Exposed_Lower_leg
	0.13(D'=0.51)	rs2839231	3.866e-53	21	46614864	MCM3AP	1.09549e-05	7.37863	1.85514e-09	cis	Heart_Atrial_Appendage
	0.15(D'=0.98)	rs2839235	2.237e-54	21	46625020	YBEY	2.21435e-06	7.48944	7.97931e-10	cis	Cells_EBV-transformed_lymphocytes
	0.15(D'=0.98)	rs2839235	2.237e-54	21	46625020	YBEY	3.47887e-06	7.42181	6.18144e-17	cis	Heart_Left_Ventricle
	0.15(D'=0.99)	rs9306152	7.35e-55	21	46632214	YBEY	6.80735e-06	7.45626	8.97343e-11	cis	Brain_Anterior_cingulate_cortex_BA24
	0.15(D'=0.99)	rs9306152	7.35e-55	21	46632214	YBEY	3.39789e-06	7.49446	6.58806e-14	cis	Brain_Hippocampus
	0.15(D'=0.99)	rs9306152	7.35e-55	21	46632214	YBEY	1.34862e-05	7.30444	9.84256e-11	cis	Spleen
	0.02(D'=0.19)	rs2073382	2.376e-48	21	46642726	MCM3AP	2.83086e-06	7.45826	1.0292e-11	cis	Artery_Aorta
	0.23(D'=0.62)	rs2839243	1.173e-95	21	46655271	MCM3AP	2.82952e-05	6.70563	2.45831e-05	cis	Artery_Coronary
	0.01(D'=0.09)	rs2839250	4.444e-45	21	46665982	PCNT	2.72294e-05	7.00303	6.00835e-06	cis	Brain_Anterior_cingulate_cortex_BA24
	0.23(D'=0.62)	rs2073374	5.085e-98	21	46672280	PCNT	1.73943e-05	7.10394	1.72491e-09	cis	Heart_Left_Ventricle
	0.29(D'=1.0)	rs2073380	1.234e-273	21	46688185	DIP2A	4.24428e-05	6.13506	9.91759e-05	cis	Artery_Coronary
	0.25(D'=1.0)	rs743347	9.123e-84	21	46688884	DIP2A	1.69851e-05	6.69168	1.22855e-05	cis	Artery_Aorta
	0.41(D'=1.0)	rs11702704	2.067e-163	21	46692749	PCNT	4.1958e-05	5.971	5.10275e-05	cis	Brain_Caudate_basal_ganglia
	0.05(D'=0.23)	rs1007893	4.332e-24	21	46702022	MCM3AP	2.331e-05	6.81519	6.10175e-06	cis	Brain_Caudate_basal_ganglia
	0.05(D'=0.23)	rs1007893	4.332e-24	21	46702022	MCM3AP	4.07e-05	6.13115	8.50154e-05	cis	Brain_Cerebellar_Hemisphere
	0.05(D'=0.23)	rs1007893	4.332e-24	21	46702022	MCM3AP-AS1	2.49314e-06	7.36362	2.42137e-09	cis	Esophagus_Mucosa
	0.04(D'=0.36)	rs2330593	1.815e-109	21	46757236	MCM3AP-AS1	2.54259e-05	7.07018	7.12712e-06	cis	Brain_Nucleus_accumbens_basal_ganglia
	0.04(D'=0.36)	rs2330593	1.815e-109	21	46757236	MCM3AP	4.06814e-05	6.39336	6.03188e-05	cis	Brain_Nucleus_accumbens_basal_ganglia
	0.03(D'=0.23)	rs1892691	2.895e-68	21	46762399	PCNT	4.57666e-05	6.0146	6.35723e-05	cis	Brain_Nucleus_accumbens_basal_ganglia
	0.11(D'=0.35)	rs2096507	1.888e-40	21	46766344	MCM3AP	1.72592e-05	6.81598	3.06796e-08	cis	Adipose_Visceral_Omentum
	0.11(D'=0.35)	rs2096507	1.888e-40	21	46766344	MCM3AP-AS1	2.7972e-05	6.47167	4.3325e-05	cis	Brain_Caudate_basal_ganglia
	0.11(D'=0.35)	rs2096507	1.888e-40	21	46766344	MCM3AP	2.49314e-06	7.41865	2.0547e-16	cis	Esophagus_Mucosa
	0.00(D'=0.06)	rs2839309	2.388e-22	21	46779504	MCM3AP-AS1	4.71837e-05	5.89584	5.87438e-05	cis	Brain_Putamen_basal_ganglia
	0.13(D'=0.53)	rs2839314	1.882e-240	21	46785495	DIP2A-IT1	1.30924e-05	6.5115	3.62149e-05	cis	Whole_Blood
	0.73(D'=1.0)	rs2839317	2.509e-190	21	46788079	RPL18AP2	2.05312e-05	6.61404	9.00236e-06	cis	Muscle_Skeletal
	0.21(D'=0.93)	rs2839327	1.35e-178	21	46807080	DIP2A	1.41276e-05	6.903	9.29594e-06	cis	Artery_Tibial
	0.21(D'=0.93)	rs2839327	1.35e-178	21	46807080	DIP2A	1.98939e-05	6.40808	6.19824e-05	cis	Colon_Transverse
	0.04(D'=0.64)	rs743350	6.501e-18	21	46808403	DIP2A	1.12638e-06	7.48207	9.07745e-09	cis	Cells_Transformed_fibroblasts
	0.04(D'=0.64)	rs2839339	5.659e-18	21	46814079	DIP2A	1.7452e-05	6.78597	2.26753e-05	cis	Esophagus_Mucosa
	0.08(D'=0.99)	rs2839341	2.265e-133	21	46814436	COL6A2	1.9816e-05	6.60186	4.5164e-05	cis	Artery_Aorta
	0.05(D'=0.92)	rs1981331	1.615e-21	21	46819871	PRMT2	5.13281e-06	7.11875	1.96118e-07	cis	Muscle_Skeletal
	0.08(D'=0.44)	rs7284000	1.782e-138	21	46826041	S100B	1.11359e-06	7.45431	3.99848e-23	cis	Adipose_Subcutaneous
	0.10(D'=0.38)	rs2839349	2.992e-53	21	46841625	COL6A2	2.331e-05	7.15317	1.25321e-05	cis	Brain_Caudate_basal_ganglia
	0.10(D'=0.38)	rs2839349	2.992e-53	21	46841625	C21orf58	1.57693e-05	6.1785	8.04978e-05	cis	Cells_Transformed_fibroblasts
	0.02(D'=0.30)	rs2839350	3.9e-128	21	46841648	DIP2A	3.1288e-05	6.96917	3.73733e-06	cis	Brain_Cerebellum
	0.02(D'=0.30)	rs2839350	3.9e-128	21	46841648	PRMT2	9.01104e-06	7.02617	9.4246e-09	cis	Cells_Transformed_fibroblasts
	0.02(D'=0.30)	rs2839350	3.9e-128	21	46841648	DIP2A	1.73943e-05	7.15904	5.67694e-06	cis	Heart_Left_Ventricle
	0.02(D'=0.30)	rs2839350	3.9e-128	21	46841648	DIP2A	1.36572e-05	7.03639	4.31466e-06	cis	Testis
	0.03(D'=0.19)	rs3788266	5.861e-10	21	46850783	S100B	1.08413e-06	7.21186	1.30774e-10	cis	Skin_Sun_Exposed_Lower_leg
	0.08(D'=0.42)	rs7282126	6.695e-145	21	46852424	S100B	1.72592e-06	7.43427	1.26595e-19	cis	Adipose_Visceral_Omentum
	0.08(D'=0.42)	rs7282126	6.695e-145	21	46852424	S100B	1.70184e-06	7.40761	1.26083e-12	cis	Breast_Mammary_Tissue
	0.12(D'=0.43)	rs8127280	1.707e-95	21	46856015	S100B	2.29832e-05	6.7787	1.3007e-05	cis	Brain_Cortex
	0.10(D'=0.49)	rs6518304	2.143e-177	21	46859933	MCM3AP-AS1	3.48939e-05	6.38058	4.24493e-05	cis	Ovary
	0.09(D'=0.48)	rs11910707	1.261e-205	21	46866941	S100B	2.2477e-06	7.52244	8.11195e-08	cis	Spleen
	0.00(D'=0.22)	rs2839370	3.719e-21	21	46882056	PRMT2	1.41276e-05	6.62746	1.98274e-05	cis	Artery_Tibial
	0.00(D'=0.22)	rs2839370	3.719e-21	21	46882056	PRMT2	4.82393e-06	7.34328	5.36463e-12	cis	Lung
	0.00(D'=0.22)	rs2839370	3.719e-21	21	46882056	PRMT2	8.00641e-06	7.10693	7.32276e-06	cis	Nerve_Tibial
	0.03(D'=0.83)	rs7283588	5.207e-17	21	46883466	DSTNP1	1.60128e-05	6.42866	5.66386e-05	cis	Nerve_Tibial
	0.03(D'=0.81)	rs7279368	8.021e-17	21	46890427	PRMT2	1.11359e-05	6.77677	1.5266e-06	cis	Adipose_Subcutaneous
	0.03(D'=0.81)	rs7279368	8.021e-17	21	46890427	PRMT2	1.13234e-05	7.08504	1.31117e-07	cis	Artery_Aorta
	0.03(D'=0.81)	rs7279368	8.021e-17	21	46890427	PRMT2	1.7452e-05	6.76103	1.14251e-06	cis	Esophagus_Mucosa
	0.03(D'=0.81)	rs7279368	8.021e-17	21	46890427	PRMT2	1.78253e-05	7.17965	2.35974e-06	cis	Pancreas
	0.01(D'=0.36)	rs2298370	1.562e-19	21	46904905	FTCD	3.40368e-05	6.57519	4.95438e-05	cis	Brain_Anterior_cingulate_cortex_BA24
	0.01(D'=0.36)	rs2298370	1.562e-19	21	46904905	SPATC1L	4.76515e-05	6.21462	8.93465e-05	cis	Brain_Anterior_cingulate_cortex_BA24
	0.01(D'=0.36)	rs2298370	1.562e-19	21	46904905	SPATC1L	9.19329e-06	7.24559	2.38601e-06	cis	Brain_Cortex
	0.01(D'=0.36)	rs2298370	1.562e-19	21	46904905	SPATC1L	2.57467e-05	7.01891	1.34959e-06	cis	Brain_Frontal_Cortex_BA9
	0.08(D'=0.8)	rs3747011	2.12e-125	21	46909056	PRMT2	3.90206e-06	7.41	1.70544e-06	cis	Testis
